# Supplementary material for: Loading of individual Se-doped Fe2O3-decorated Ni/NiO particles on carbon cloth: facile synthesis and efficient electrocatalysis for the oxygen evolution reaction
Source: Royal Society of Chemistry journal article supplement (doi:10.1039/d0dt03094e), 2020-01-01
Supplement: d0dt03094e1.pdf [file d0dt03094e1.pdf]

**Loading of Individual Se-doped Fe<sub>2</sub>O<sub>3</sub> Decorated Ni/NiO Particles on Carbon Cloth:  
Novel Synthesis and Efficient Electrocatalysis for Oxygen Evolution Reaction**

Sayyar Ali Shah,<sup>a</sup> Guoxing Zhu,<sup>b</sup> Aihua Yuan,\*<sup>a</sup> Nabi Ullah,<sup>b</sup> Xiaoping Shen,\*<sup>b</sup> Habib Khan,<sup>c</sup> Keqiang Xu,<sup>b</sup> Xuyun Wang,<sup>a</sup> Xiufen Yan,<sup>a</sup>

<sup>a</sup>*School of Environmental & Chemical Engineering, Jiangsu University of Science and Technology, Zhenjiang 212003, PR China*

<sup>b</sup>*School of Chemistry and Chemical Engineering, Jiangsu University, Zhenjiang 212013, PR China*

<sup>c</sup>*School of Chemical Engineering and Technology, Xian Jiaotong University, Xian 710049, PR China*

*\*Corresponding author: Tel.: +86 511 88791800.*

*E-mail address: aihua.yuan@just.edu.cn (A. H. Yuan), xiaopingshen@163.com (X. P. Shen).*

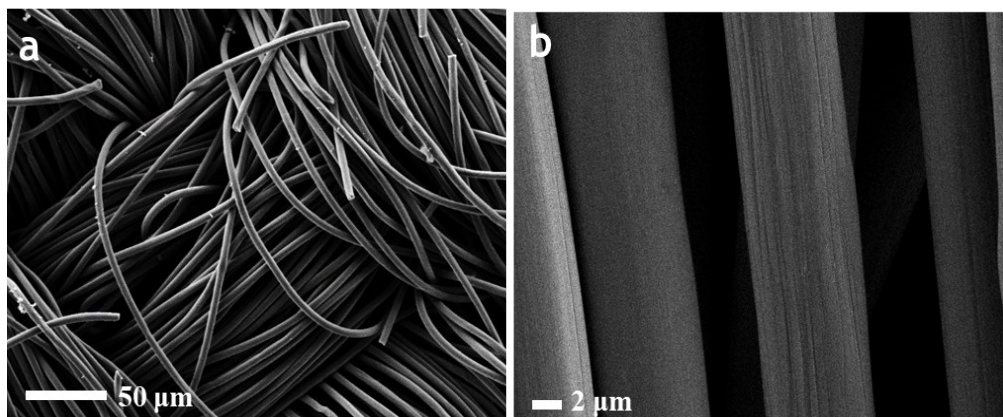

**Figure S1.** (a and b) SEM images of CC at different magnifications.

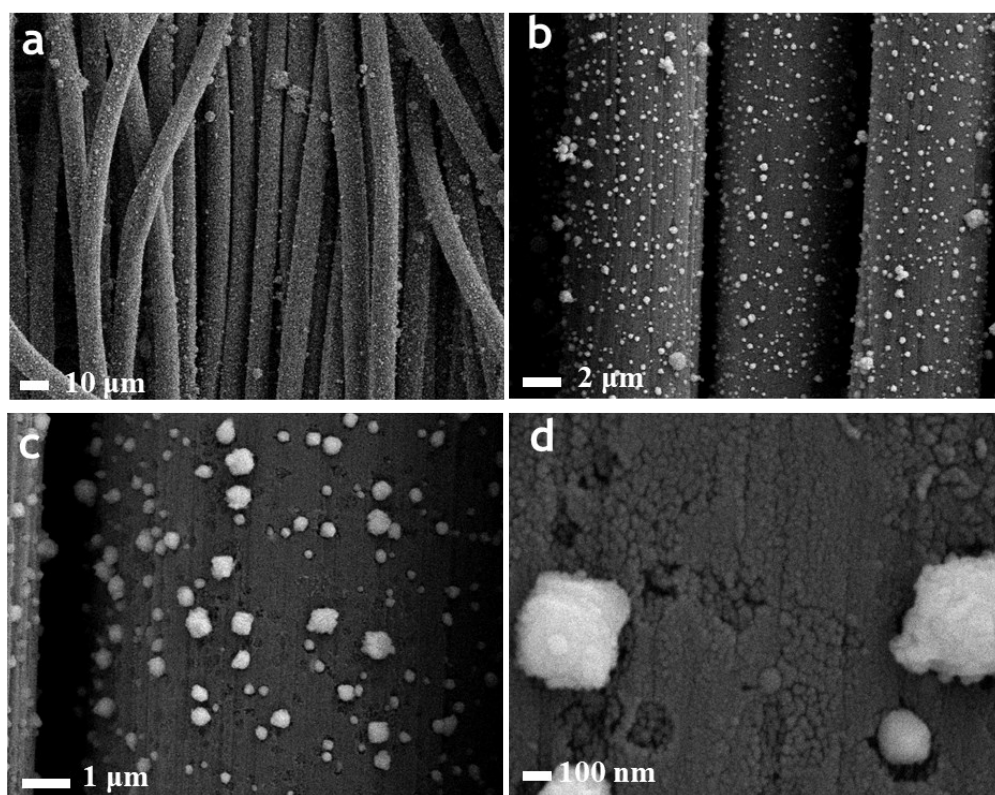

**Figure S2.** (a-d) SEM images of Se-Fe<sub>2</sub>O<sub>3</sub>@Ni/NiO/CC-1 composite at different magnifications.

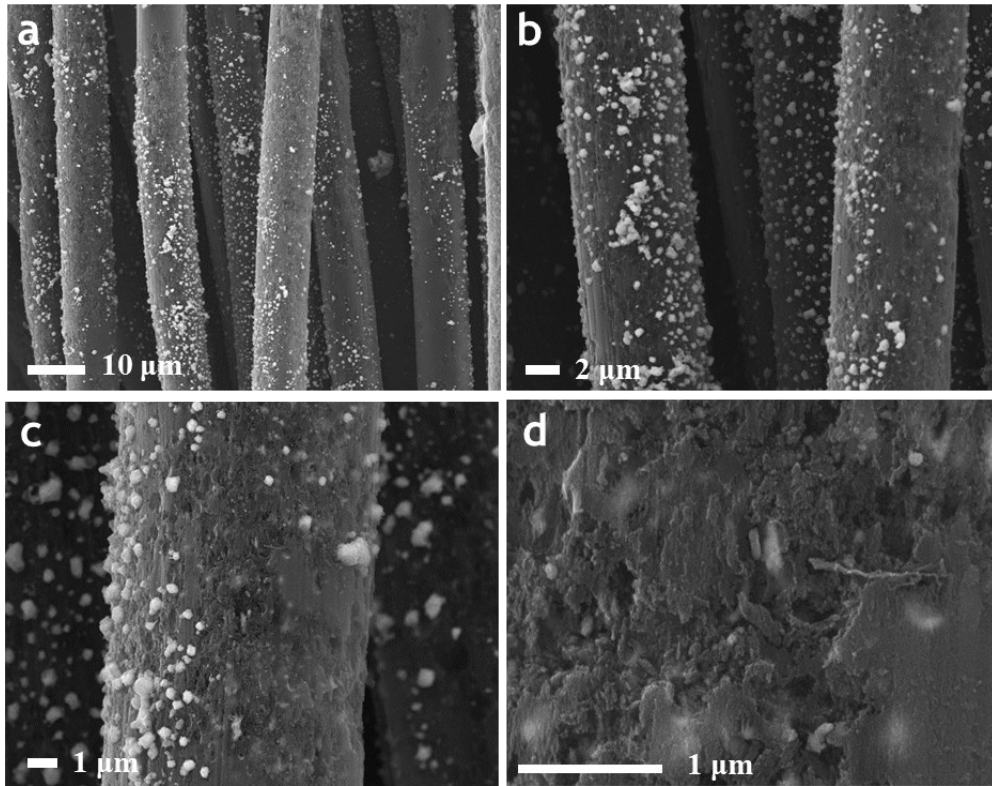

**Figure S3.** (a-d) SEM images of Se-Fe<sub>2</sub>O<sub>3</sub>@Ni/NiO/CC-3 composite at different magnifications.

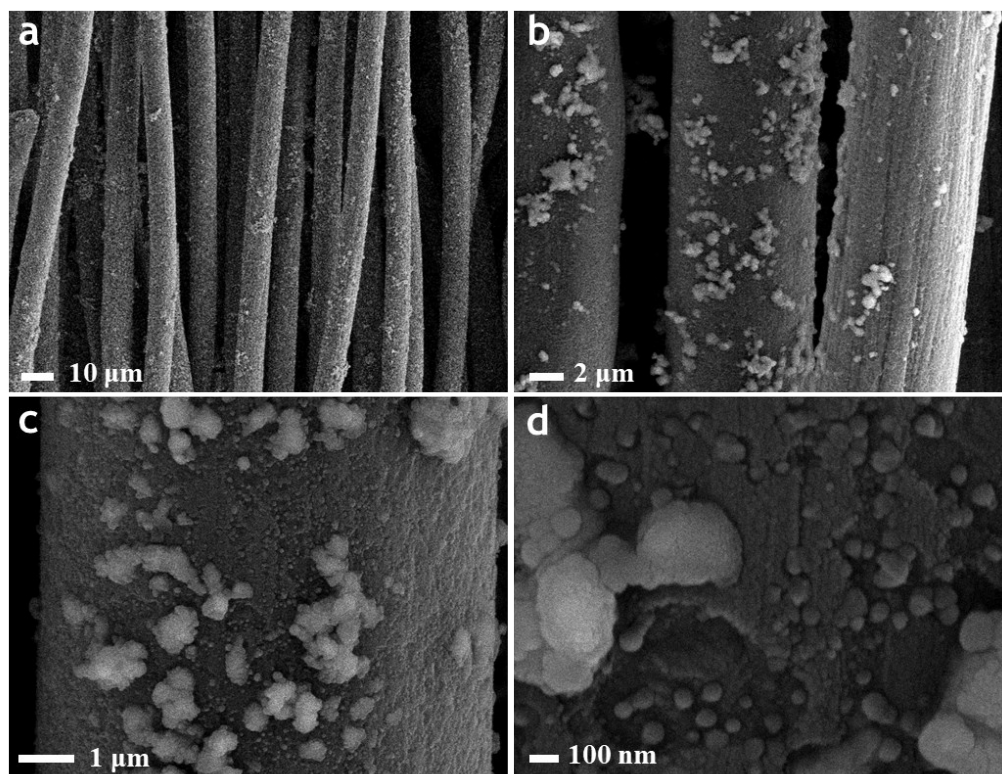

**Figure S4.** (a-d) SEM images of Se-Fe<sub>2</sub>O<sub>3</sub>/CC product at different magnifications.

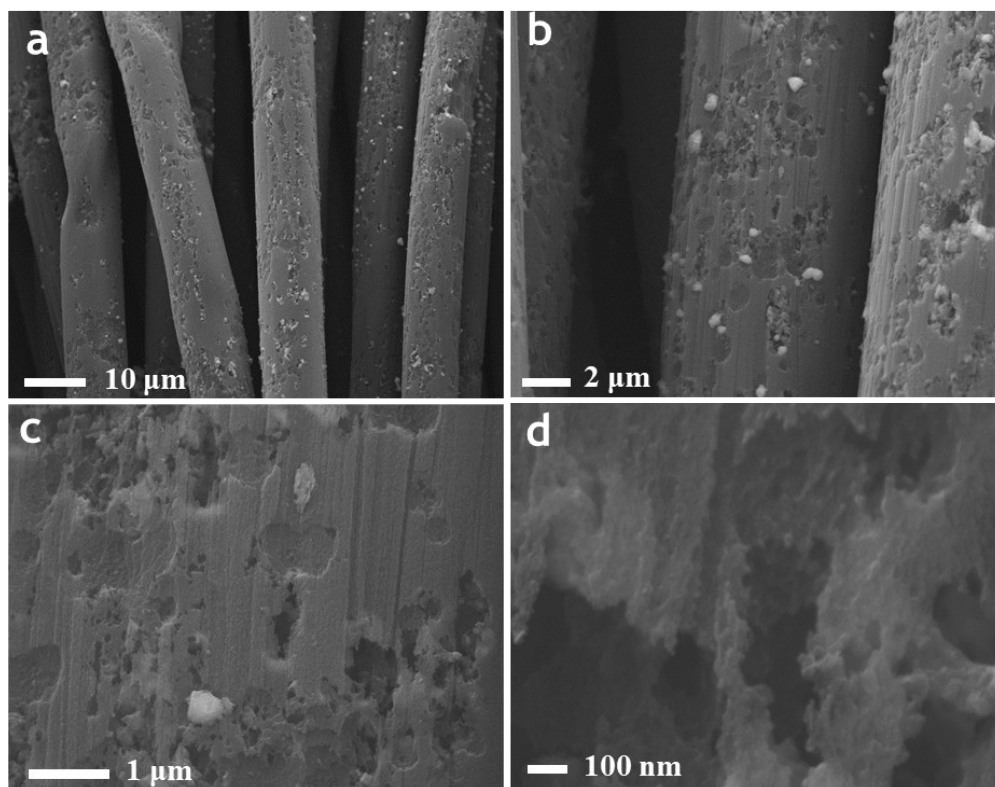

**Figure S5.** (a-d) SEM images of Se-Ni/NiO/CC-2 composites at different magnifications.

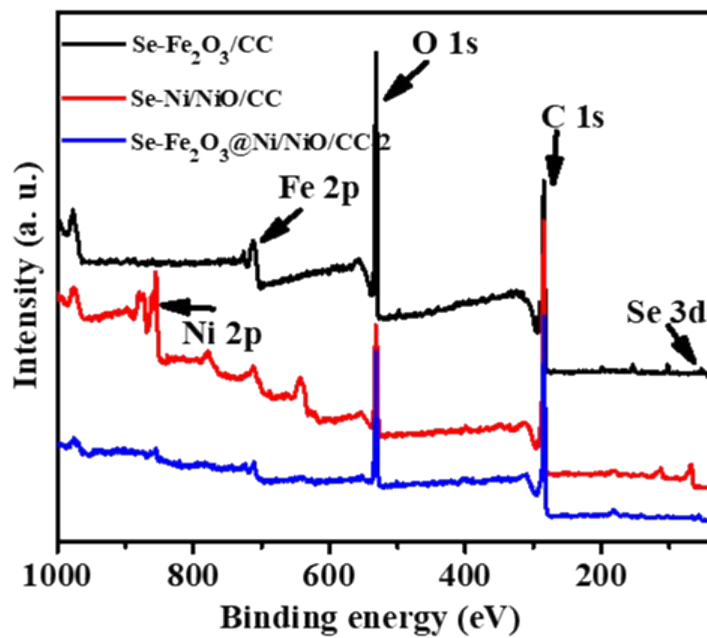

**Figure S6.** Survey XPS spectra of Se-Fe<sub>2</sub>O<sub>3</sub>@Ni/NiO/CC-2, Se-Ni/NiO/CC and Se-Fe<sub>2</sub>O<sub>3</sub>/CC products.

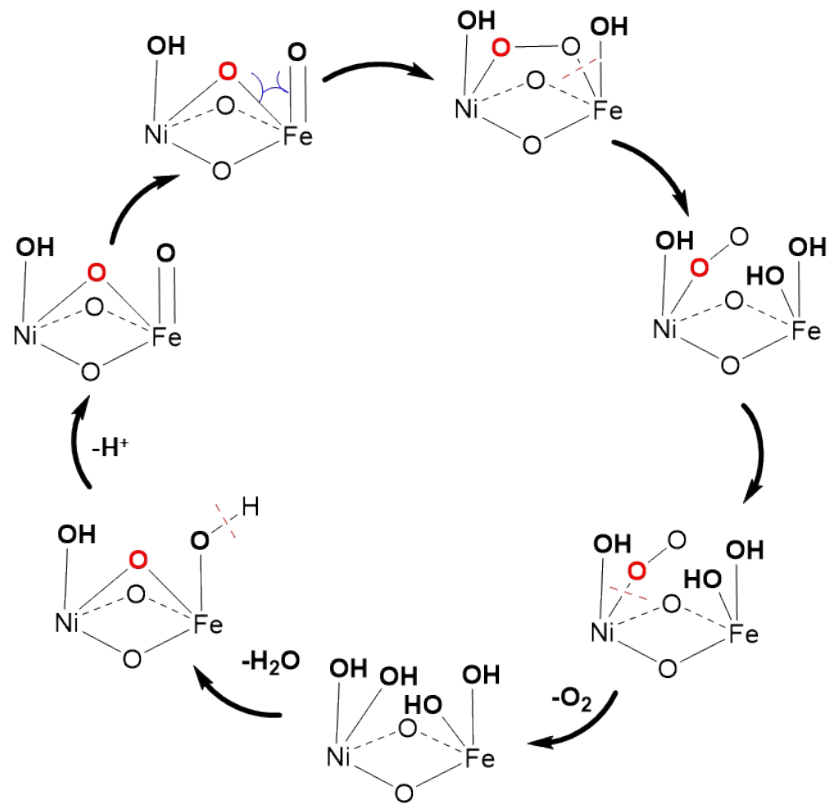

**Figure S7.** The proposed OER reaction path using  $\text{Fe}_2\text{O}_3@\text{Ni}/\text{NiO}/\text{CC-2}$  catalyst.

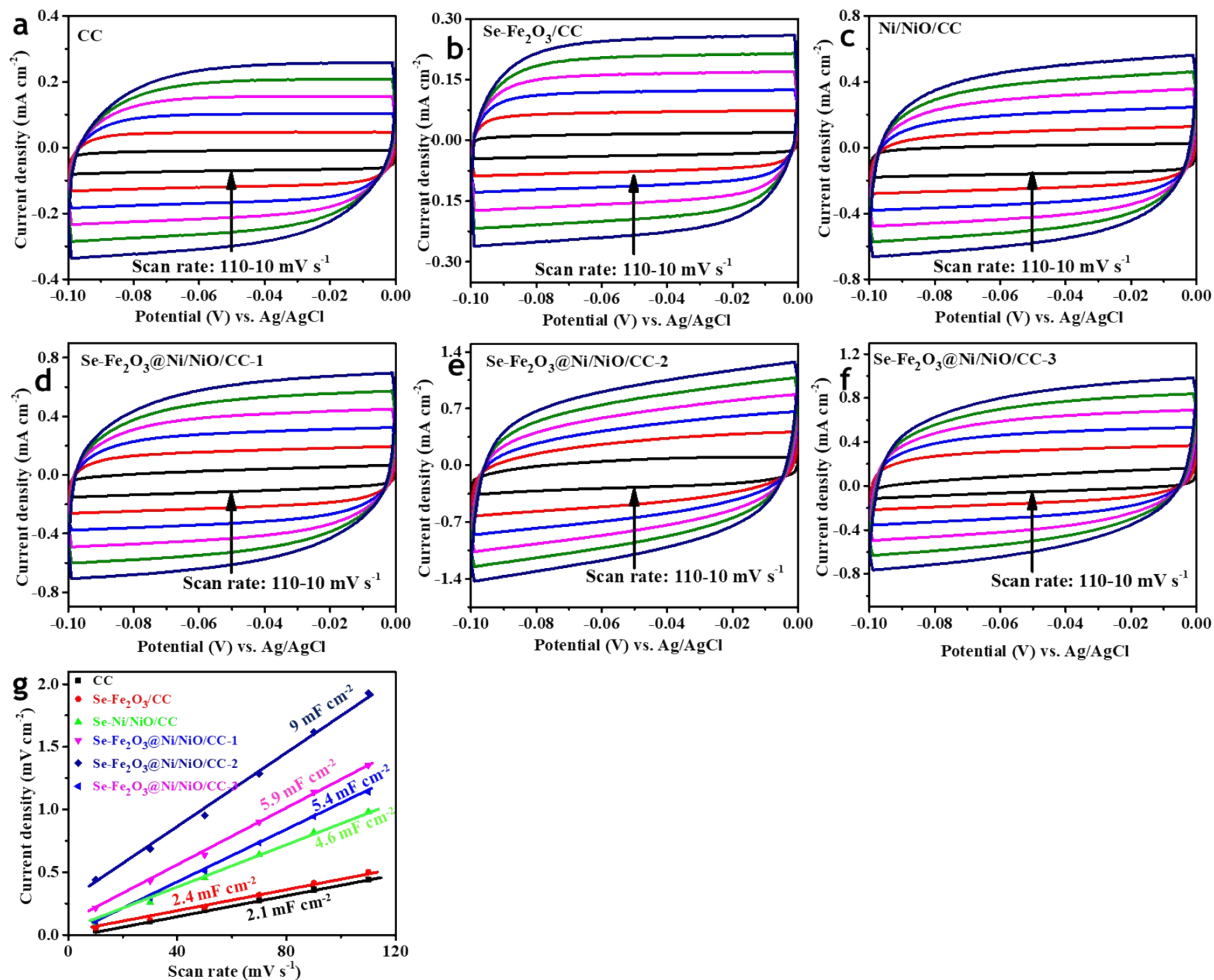

**Figure S8.** (a-f) CV curves of as-synthesized samples and CC between -0.1 and 0 V vs. Ag/AgCl at the scan rates of 10, 30, 50, 70, 90 and 110 mV s<sup>-1</sup> in 1.0 M KOH solution. (g) The  $C_{dl}$  was used to determine electrochemical surface area of catalysts. The  $C_{dl}$  values was calculated by plotting the  $\Delta J = (J_a - J_c)$  at -0.05 V vs. Ag/AgCl against various scan rates, the  $2C_{dl}$  is equal to the slope.

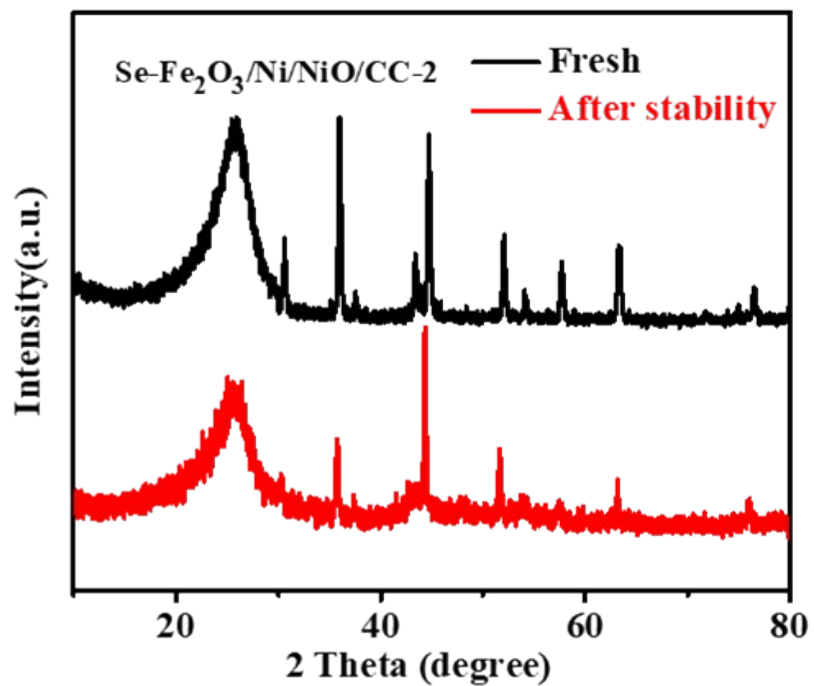

**Figure S9.** XRD patterns of the fresh and 2000 cycle used Se-Fe<sub>2</sub>O<sub>3</sub>@Ni/NiO/CC-2 catalyst.

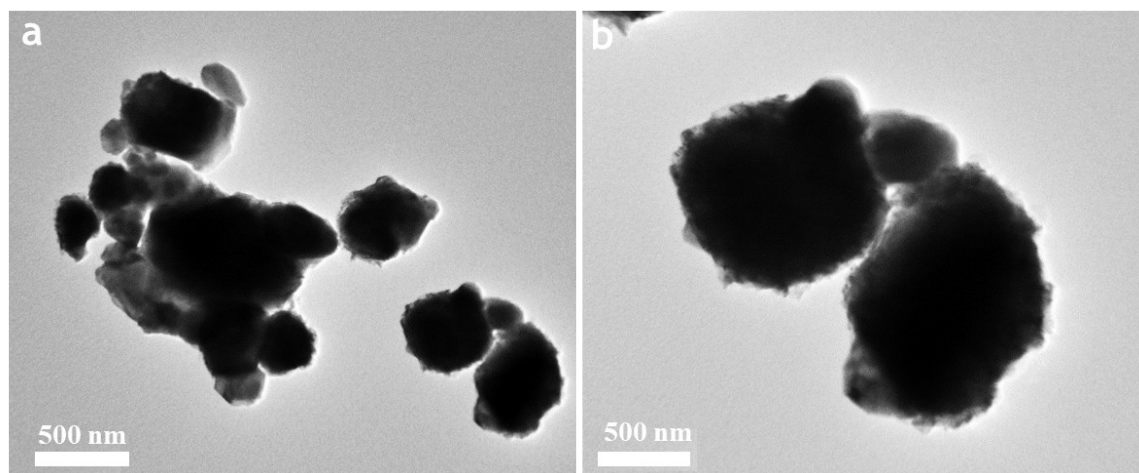

**Figure S10.** TEM images of Se-Fe<sub>2</sub>O<sub>3</sub>@Ni/NiO/CC-2 after 2000 CV cycles.



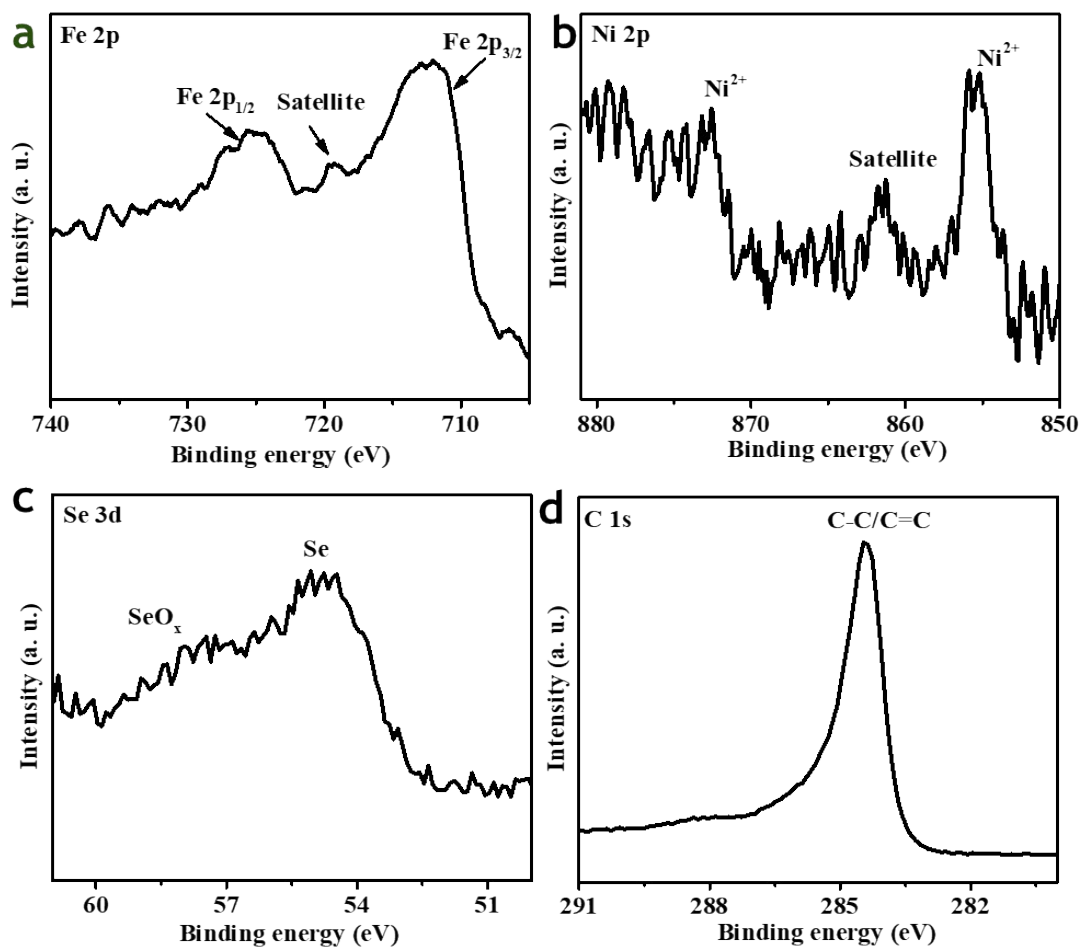

**Figure S11.** XPS spectra of the Se-Fe<sub>2</sub>O<sub>3</sub>@Ni/NiO/CC-2 sample after 2000 CV cycles: (a) Fe 2p, (b) Ni 2p, (c) Se 3d and (d) C1s.

**Table S1.** Electrochemical parameters of the as-synthesized samples and CC.

| Catalytic materials                            | ( $\eta$ ) mV@ ( $j$ )10 mA cm <sup>-2</sup> | ( $\eta$ ) mV@ ( $j$ ) 100 mA cm <sup>-2</sup> | Tafel slop (mV dec <sup>-1</sup> ) | $R_{CT}$ ( $\Omega$ ) | $C_{dl}$ mF cm <sup>-2</sup> |
|------------------------------------------------|----------------------------------------------|------------------------------------------------|------------------------------------|-----------------------|------------------------------|
| CC                                             | 526                                          | —                                              | 169                                | 2.73                  | 2.1                          |
| Se-Fe <sub>2</sub> O <sub>3</sub> @/CC         | 409                                          | —                                              | 92                                 | 3.12                  | 2.4                          |
| Se-Fe <sub>2</sub> O <sub>3</sub> @Ni/NiO/CC-1 | 298                                          | 393                                            | 51                                 | 2.69                  | 5.4                          |
| Se-Fe <sub>2</sub> O <sub>3</sub> @Ni/NiO/CC-2 | 205                                          | 273                                            | 36                                 | 2.17                  | 9.0                          |
| Se-Fe <sub>2</sub> O <sub>3</sub> @Ni/NiO/CC-3 | 288                                          | 350                                            | 38                                 | 2.3                   | 5.9                          |
| Se-Ni/NiO/CC                                   | 320                                          | 416                                            | 67                                 | 2                     | 4.6                          |

**Table S2.** OER performances of the Fe-Ni-based materials as electrocatalysts in 1.0 M KOH solution.

| Catalysts                                                         | ( $\eta$ ) mV@ ( $j$ ) mA cm <sup>-2</sup> | Tefel slope<br>(mV dec <sup>-1</sup> ) | Ref.                                 |
|-------------------------------------------------------------------|--------------------------------------------|----------------------------------------|--------------------------------------|
| Se-Fe <sub>2</sub> O <sub>3</sub> @Ni/NiO/CC-2                    | <b>205@10</b>                              | <b>36</b>                              | <b>This work</b>                     |
| Ni <sub>x</sub> Fe <sub>1-x</sub> Se <sub>2</sub>                 | 195@10                                     | 28                                     | Nat. Commun. <sup>S1</sup>           |
| NiO/NiFe LDH on Cu Foam                                           | 205@30                                     | 30                                     | Adv. Mater. <sup>S2</sup>            |
| MoS <sub>2</sub> /NiFe-LDH                                        | 210@10                                     | 65                                     | Nano Lett. <sup>S3</sup>             |
| Single-crystalline NiFe DLH                                       | 210@20                                     | 46                                     | J. Mater. Chem. A <sup>S4</sup>      |
| NiFe-LDH/MXene/NF                                                 | 229@10                                     | 44                                     | Nano Energy <sup>S5</sup>            |
| CuO@Ni/NiFe hydroxides                                            | 230@10                                     | 65                                     | Electrochim. Acta <sup>S6</sup>      |
| CoFeNi oxide                                                      | 230@10                                     | 40.7                                   | Nano Res. <sup>S7</sup>              |
| Ni <sub>0.5</sub> Fe <sub>0.5</sub> Se <sub>2</sub> nanodendrites | 235@10                                     | 34.7                                   | Catal. Sci. Technol. <sup>S8</sup>   |
| Ni/NiO/Fe <sub>3</sub> O <sub>4</sub>                             | 258@10                                     | 62                                     | Electrochim. Acta <sup>S9</sup>      |
| NiFe hydroxide                                                    | 270@10                                     | 36.2                                   | Angew. Chem. Int. Ed. <sup>S10</sup> |
| FeNi@NC                                                           | 280@10                                     | 70                                     | Energy Environ. Sci. <sup>S11</sup>  |
| NiFe-V <sub>M</sub> -O                                            | 371@10                                     | 28                                     | ACS Catal <sup>S12</sup>             |
| Ni <sub>3</sub> FeN/NRGO                                          | 400@10                                     | 62                                     | Small <sup>S13</sup>                 |

## References

[1] X. Xu, F. Song, X. Hu, *Nat. Commun.*, 2016, **7**, 12324.

- [2] Z. W. Gao, J. Y. Liu, X. M. Chen, X. L. Zheng, J. Mao, H. Liu, T. Ma, L. Li, W. C. Wang, X. W. Du, *Adv. Mater.*, 2019, **31**, 1804769.
- [3] P. Xiong, X. Zhang, H. Wan, S. Wang, Y. Zhao, J. Zhang, D. Zhou, W. Gao, R. Ma, T. Sasaki, G. Wang, *Nano Lett.*, 2019, **19**, 4518–4526.
- [4] X. Liu, X. Wang, X. Yuan, W. Dong, F. Huang, *J. Mater. Chem. A*, 2016, **4**, 167–172.
- [5] M. Yu, Z. Wang, J. Liu, F. Sun, P. Yang, J. Qiu, *Nano Energy*, 2019, **63**, 103880.
- [6] Y. Liu, Z. Jin, X. Tian, X. Li, Q. Zhao, D. Xiao, *Electrochim. Acta*, 2019, **318**, 695-702.
- [7] L. Han, L. Guo, C. Dong, C. Zhang, H. Gao, J. Niu, Z. Peng, Z. Zhang, *Nano Res.*, 2019, **12**, 2281–2287.
- [8] Y. Du, G. Cheng, W. Luo, *Catal. Sci. Technol.*, 2017, **7**, 4604–4608.
- [9] Y. Xie, X. Wang, K. Tang, Q. Li, C. Yan, *Electrochim. Acta*, 2018, **264**, 225-232.
- [10] D. Zhou, S. Wang, Y. Jia, X. Xiong, H. Yang, S. Liu, J. Tang, J. Zhang, D. Liu, L. Zheng, Y. Kuang, X. Sun, B. Liu, *Angew. Chem. Int. Ed.*, 2019, **58**, 736 –740.
- [11] X. J. Cui, P. J. Ren, D. H. Deng, J. Deng, X. H. Bao, *Energy Environ. Sci.*, 2016, **9**, 123–129.
- [12] H. J. Lee, S. Back, J. H. Lee, S. H. Choi, Y. Jung, J. W. Choi. *ACS Catal.*, 2019, **9**, 7099–7108.
- [13] Y. Fan, S. Ida, A. Staykov, T. Akbay, H. Hagiwara, J. Matsuda, K. Kaneko, T. Ishihara, *Small*, 2017, **13**, 1700099.
